# Supplementary material for: Infections Caused byActinomyces neuii: A Case Series and Review of an Unusual Bacterium
Source: Hindawi journal article supplement (doi:10.1155/2016/6017605), 2016-01-01
Supplement: f1 [file 6017605.f1.pdf]

# Infections caused by *Actinomyces neuii*: a case series and review of an unusual bacterium

## Supplementary data

16S rRNA gene segment sequences used for the confirmation of *A. neuii* identification

>sequence 1

```
GGGATCCATTGGTGGCTTGCACTTTTGGTGAGAGTGGCGAACGGGTGAGTA
ACACGTGAGTAACCTGCCCTTTTCTTTGGGATAAGCCTGGGAAACTGGGT
CTAATACTGGATGTTCCGGCTTCCTCGCATGGGGTTGTTGGGAAAGGTTT
TTTCTGGATTGGGATGGGCTCGCGGCTTATCAGCTTGTGGTGGGGTGAT
GGCTTACCAAGGCTTTGACGGGTAGCCGGCCTGAGAGGGTGGTCGGTCAC
ACTGGGACTGAGATACGGCCAGACTCCTACGGGAGGCAGCAGTGGGGGA
TATTGCACAATGGACGCAAGTCTGATGCAGCGACGTCGTGTGGGGATGA
AGGCCTTCGGGTTGTAAACTCCTTTTCGCTGCGGAAAAGGCAGGGTTTTG
GCCTTGTGGATGGTAGTGGGTAAAGAAGCGCCGGCTAACTACGTGCCAGC
AGCCGCGGTAATACGTAGGGCGCGAGCGTTGTCCGGAATTATTGGGCGTA
AAGGGCTCGTAGGCGGTTTGTGCGCTTAGCGTTTAAGGCTCGGGCTTAA
CCCGGGTTTGCCTTGGGTACGGGCAGGCTTGAGTGCGGTAGGGGTAAGT
GAATTCCTGGTGTAGCGGTGGAATGCGCAGATATCAGGAGGAACACCGGT
GGCGAAGGCGGGTTACTGGGCCGTTACTGACGCTGAGGAGCGAGAGCGT
```

>sequence 2

```
GTGCTTGCACTTTTGGTGAGAGTGGCGAACGGGTGAGTAACACGTGAGTA
ACCTGCCCTTTTCTTTGGGATAAGCCTGGGAAACTGGGTCTAATACTGGA
TGTTCCGGCTTCCTCGCATGGGGTTGTTGGGAAAGGTTTTTTCTGGATTG
GGATGGGCTCGCGGCTTATCAGCTTGTGGTGGGGTGATGGCTTACCAAG
GCTTTGACGGGTAGCCGGCCTGAGAGGGTGGTCGGTCACACTGGGACTGA
GATACGGCCCAGACTCCTACGGGAGGCAGCAGTGGGGGATATTGCACAAT
GGACGCAAGTCTGATGCAGCGACGTCGTGTGGGGATGAAGGCCTTCGGG
TTGTAAACTCCTTTTCGCTGCGGAAAAGGCAGGGTTTTGGCCTTGTGGAT
GGTAGTGGGTAAAGAAGCGCCGGCTAACTACGTGCCAGCAGCCGCGGTAA
T
```

>sequence 3

```
CTAATACTGGATGTTCCGGCTTCCTCGCATGGGGTTGTTGGGAAAGGTTT
TTTCTGGATTGGGATGGGCTCGCGGCTTATCAGCTTGTGGTGGGGTGAT
GGCTTACCAAGGCTTTGACGGGTAGCCGGCCTGAGAGGGTGGTCGGTCAC
ACTGGGACTGAGATACGGCCAGACTCCTACGGGAGGCAGCAGTGGGGGA
TATTGCACAATGGACGCAAGTCTGATGCAGCGACGTCGTGTGGGGATGA
AGGCCTTCGGGTTGTAAAC
```

>sequence 4

```
GTGTTTTTGGTGAGAGTGGCGAACGGGTGAGTAACACGTGAGTAACCTGC
CCTTTTCTTTGGGATAAGCCTGGGAAACTGGGTCTAATACTGGATGTTCC
GGCTTCCTCGCATGGGGTTGTTGGGAAAGGTTTTTTCTGGATTGGGATGG
GCTCGCGGCTTATCAGCTTGTGGTGGGGTGATGGCTTACCAAGGCTTTG
ACGGGTAGCCGGCCTGAGAGGGTGGTCGGTCACACTGGGACTGAGATACG
GCCCAGACTCCTACGGGAGGCAGCAGTGGGGGATATTGCACAATGGACGA
AAGTCTGATGCAGCGACGTCGTGTGGGGATGAAGGCCTTCGGGTTGTAA
ACTCCTTTTCGCCCAGGAAAAGGCAGGGTTTTGGCCTTGTGGATGGTAG
```

>sequence 5

TCGAACGGGATCCATTGGTGCTTGCACTTTTGGTGAGAGTGGCGAACGGG  
TGAGTAACACGTGAGTAACCTGCCCTTTTCTTTGGGATAAGCCTGGGAAA  
CTGGGTCTAATACTGGATGTTCCGGCTTCCTCGCATGGGGTTGTTGGGAA  
AGGTTTTTTCTGGATTGGGATGGGCTCGCGGCTTATCAGCTTGTTGGTGG  
GGTGATGGCTTACCAAGGCTTTGACGGGTAGCCGGCCTGAGAGGGTGGTC  
GGTCACACTGGGACTGAGATACGGCCAGACTCCTACGGGAGGCAGCAGT  
GGGGGATATTGCACAATGGACGCAAGTCTGATGCAGCGACGTCGTGTGGG  
GGATGAAGGCCTTCGGGTTGTAAACTCCTTTTCGCCTGCGGAAAAGGCAGG  
GTTTTGGCCTTGTTGATGGTAGTGGGTAAAGAAGCGCCGGCTAACTACGT  
GCCAGCAGCCGCGTAATACGTAGGGCGCGAGCGTTGTCCGGAATTATTG  
GGCGTAAAGGGCTCGTAGGCGGTTTGTGCGCTCTAGCGTTTAAGGCTCGG  
GCTTAACCCGGGTTTTCGTTGGGTACGGGCAGGCTTGAGTGCGGTAGGGG  
TAACTGGAATTCCTGGTGTAGCGGTGGAATGCGCAGATATCAGGAGGAAC  
ACCGGTGGCGAAGGCGGGTTACTGGGCCGTTACTGACGCTGAGGAGCGAG

A
